# Supplementary material for: RuP2-based hybrids derived from MOFs: highly efficient pH-universal electrocatalysts for the hydrogen evolution reaction
Source: Royal Society of Chemistry journal article supplement (doi:10.1039/d1ta01868j), 2021-01-01
Supplement: d1ta01868j1.pdf [file d1ta01868j1.pdf]

Electronic Supplementary Information (ESI) for Journal of Materials Chemistry A  
This journal is (c) The Royal Society of Chemistry 2021

## Supporting Information

### **RuP<sub>2</sub>-based hybrids derived from MOFs: highly efficient pH-universal electrocatalysts for hydrogen evolution reaction**

Ji-Sen Li,<sup>\*,a</sup> Meng-Jie Huang,<sup>a</sup> Yu-Wei Zhou,<sup>a</sup> Xiao-Nan Chen,<sup>a</sup> Shuang Yang,<sup>a</sup> Ji-Yu Zhu,<sup>a</sup> Guo-Dong Liu,<sup>a</sup> Ling-Juan Ma,<sup>b</sup> Sheng-Hao Cai,<sup>a</sup> and Ji-Yuan Han<sup>a</sup>

<sup>a</sup>Department of Chemistry and Chemical Engineering, Jining University, Qufu 273155, P. R. China.

<sup>b</sup>College of Chemistry and Chemical Engineering, Qufu Normal University, Qufu, 273165, P. R. China.

E-mail: senjili@sina.com

## S1. Figures in Supporting Information

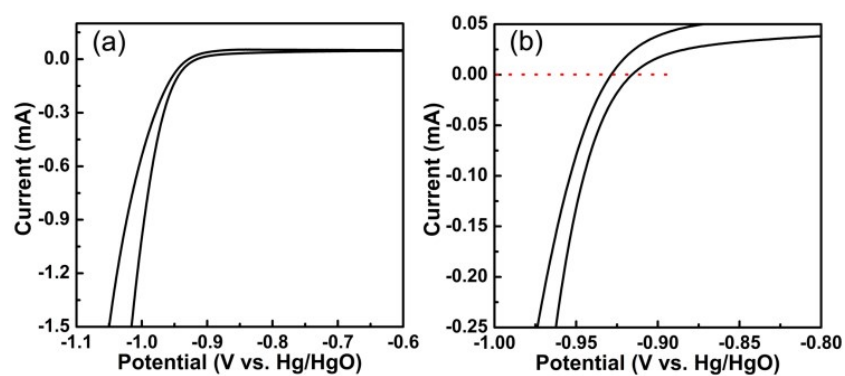

**Fig. S1** (a) CV curve of Hg/HgO electrode calibration in 1.0 M KOH and (b) The enlarged view of (a).

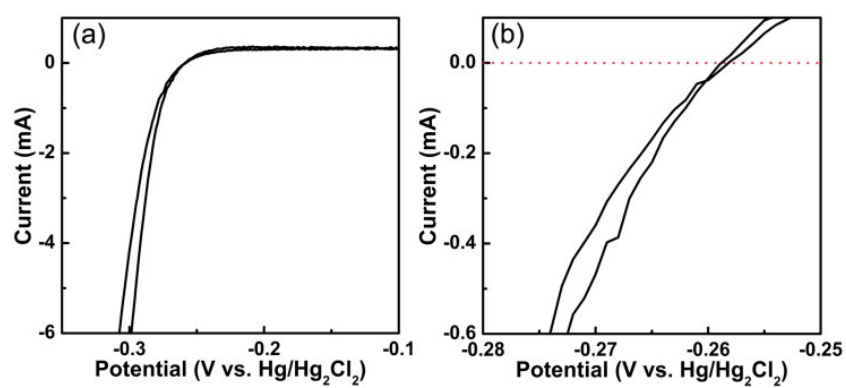

**Fig. S2** (a) CV curve of Hg/Hg<sub>2</sub>Cl<sub>2</sub> electrode calibration in 0.5 M H<sub>2</sub>SO<sub>4</sub> and (b) The enlarged view of (a).

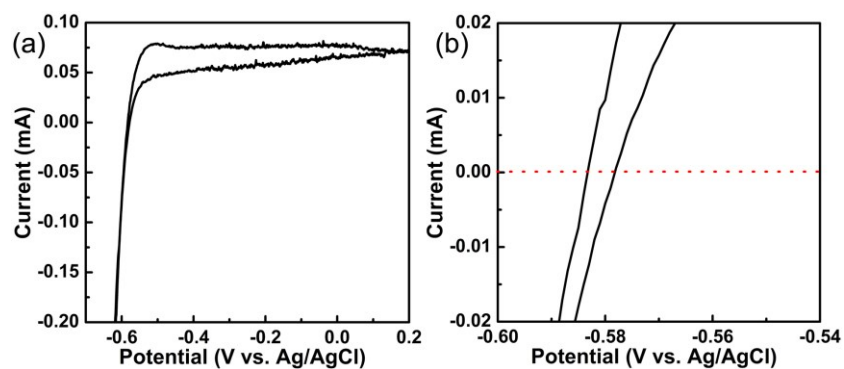

**Fig. S3** (a) CV curve of Ag/AgCl electrode calibration in 1.0 M PBS and (b) The enlarged view of (a).

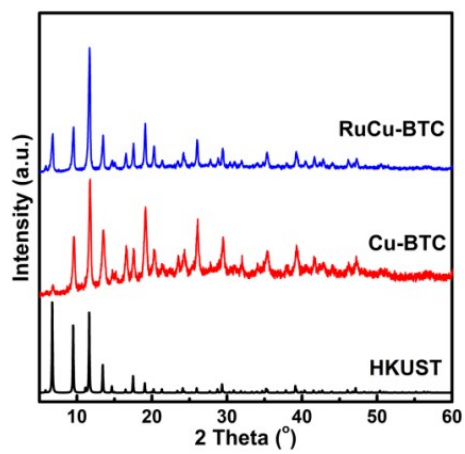

**Fig. S4.** PXRD patterns of MOF precursors.

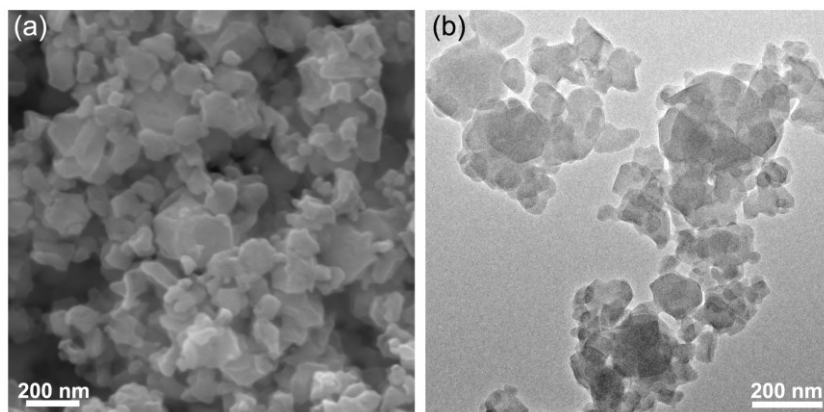

**Fig. S5** (a) SEM and (b) TEM images of Cu-BTC.

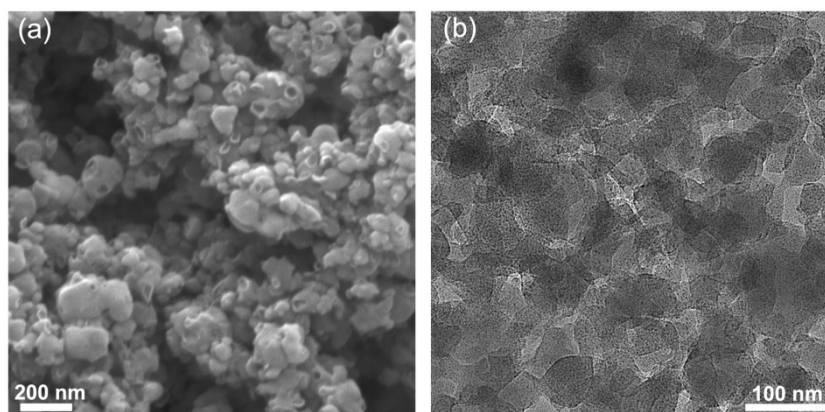

**Fig. S6** (a) SEM and (b) TEM images of RuCu-BTC.

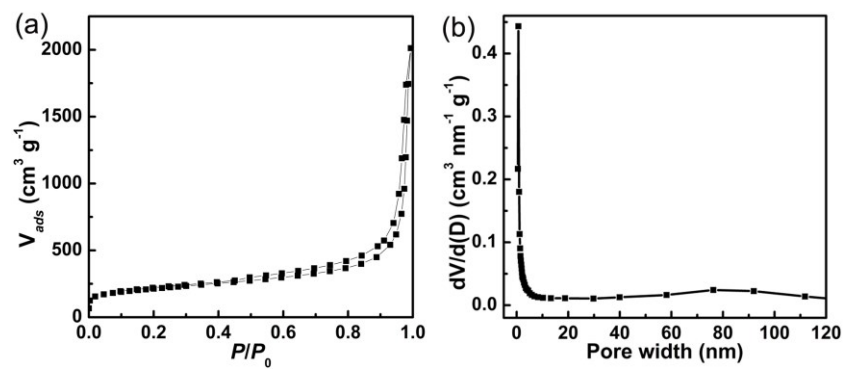

**Fig. S7** (a)  $N_2$  sorption isotherm of  $RuP_2@PC$  and (b) corresponding pore size distribution calculated using NLDFT method.

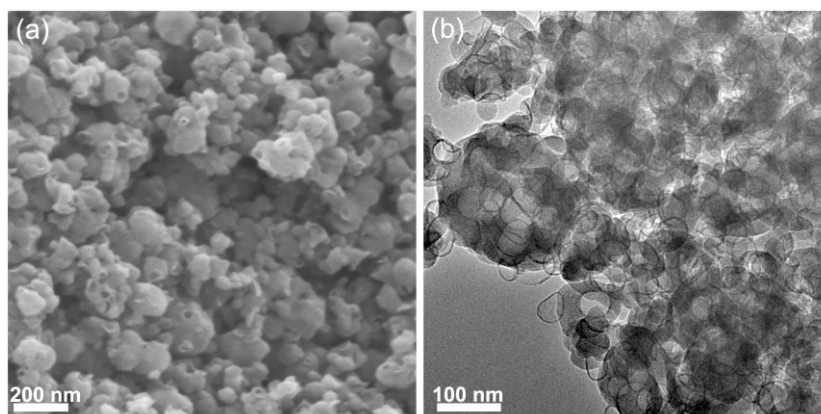

**Fig. S8** (a) SEM and (b) TEM images of PC.

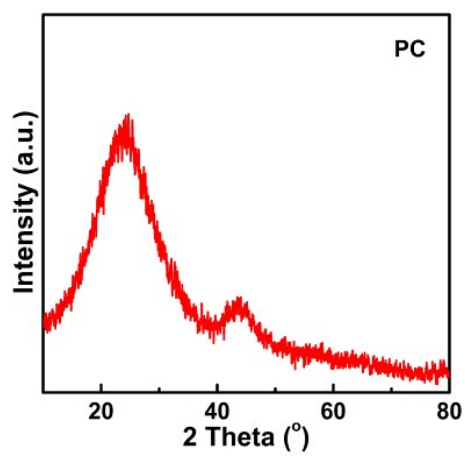

**Fig. S9** PXRD pattern of PC.

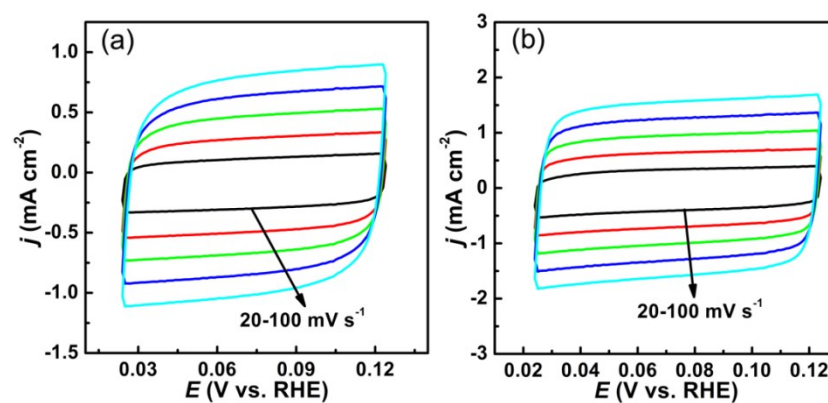

**Fig. S10** CV curves of PC and RuP<sub>2</sub>@PC in the non-Faradaic potential region recorded at different scan rates in 1.0 M KOH.

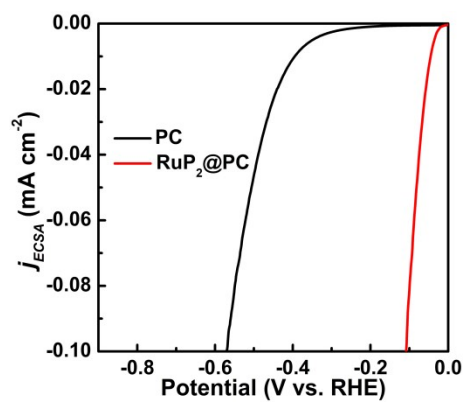

**Fig. S11** ECSA-normalized HER polarization curves for RuP<sub>2</sub>@PC in 1.0 M KOH.

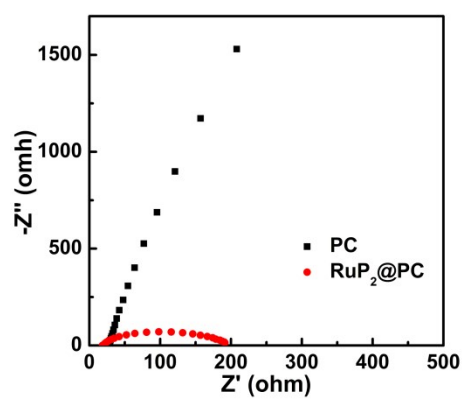

**Fig. S12** The EIS plots of PC and RuP<sub>2</sub>@PC in 1.0 M KOH at -156 mV vs RHE.

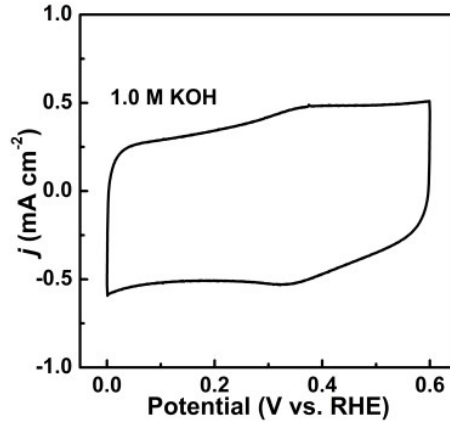

**Fig. S13** CV curve measured in 1.0 M KOH for RuP<sub>2</sub>@PC.

#### The evaluation of TOF

The calculation method of TOF values is according to the following equation:

$$\text{TOF} = \frac{j}{2Fn} \quad (1)$$

where  $j$  is the measured current density ( $\text{mA cm}^{-2}$ ) for the HER,  $F$  is the Faraday constant ( $96485 \text{ C mol}^{-1}$ ) and  $n$  is the number of active sites ( $\text{mol cm}^{-2}$ ). The factor  $1/2$  is shown because two electrons are needed to generate one hydrogen molecule. The number of active sites is achieved according to cyclic voltammograms (CV) method. Specifically, the CV curves are investigated in 1.0 M KOH, 0.5 M  $\text{H}_2\text{SO}_4$ , and 1.0 M PBS solution with the potential window range from 0 V to 0.6 V vs RHE at  $50 \text{ mV s}^{-1}$ . Then, by integrating each CV curve's charge over the whole potential range, the half value of the charge was obtained, which is the value of the surface charge density ( $Q_s$ ).

$$Q_s = Fn \quad (2)$$

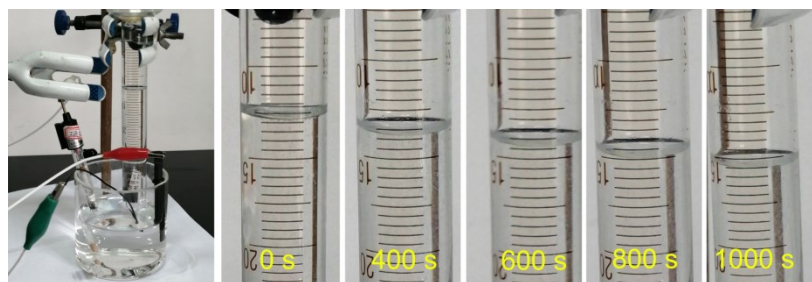

**Fig. S14** Gas collection device for HER and photographs of hydrogen collected at different time in 1.0 M KOH.

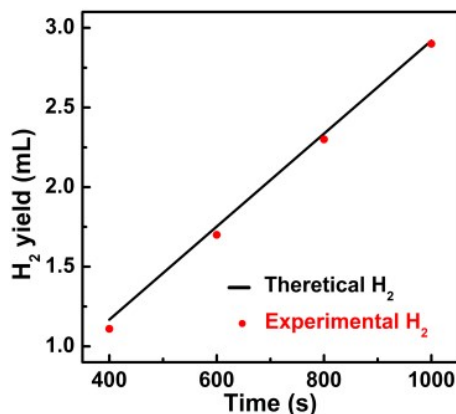

**Fig. S15** Theoretically calculated and experimentally measured amount of hydrogen versus time for RuP<sub>2</sub>@PC in 1.0 M KOH.

To estimate the faradaic efficiency (FE), a gas collection device was employed for the experiment (Fig. S14). The as-prepared catalyst (4 mg) was dispersed in the mixture of 1940  $\mu\text{L}$  ethanol solution and 40  $\mu\text{L}$  nafion solution (5 wt%) by continuous sonication for 30 min. Then, the ink was coated onto the carbon cloth ( $1 \times 1 \text{ cm}^2$ ), which was used as the working electrode. A constant current density ( $23 \text{ mA cm}^{-2}$ ) was applied on the working and the volume of the evolved gas was recorded synchronously. Thus, the FE is estimated from the observed gas volume and the theoretical gas volume calculated by the charge passed through the electrode. The related formula is as follows:  $\text{FE} = V_{\text{experimental}} / [V_m \times Q / (NF)]$ , where the  $N$  is the number of transferred electrons,  $F$  is the faraday constant ( $96485 \text{ C mol}^{-1}$ ),  $Q$  is the charge passed through the electrode, and  $V_m$  is the gas molar volume at 298 K and 101 kPa ( $24.5 \text{ L mol}^{-1}$ ). As shown Fig. S15, the faradaic efficiency of RuP<sub>2</sub>@PC for the HER is calculated to be 97.8%.

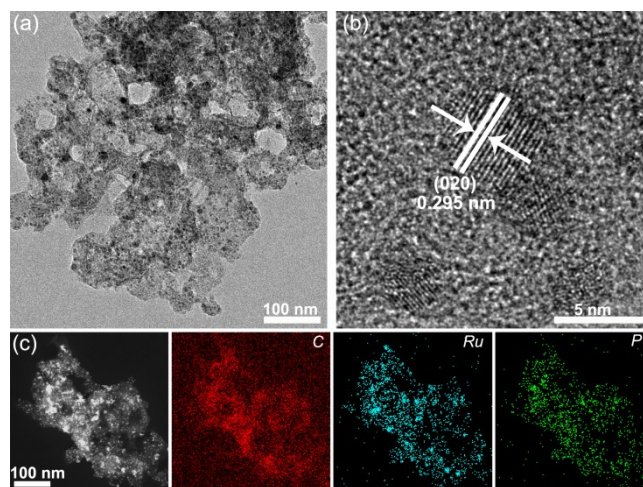

**Fig. S16** (a) TEM, (b) HRTEM, and (c) STEM and EDX elemental mapping images for C, P, and Ru in RuP<sub>2</sub>@PC after stability test.

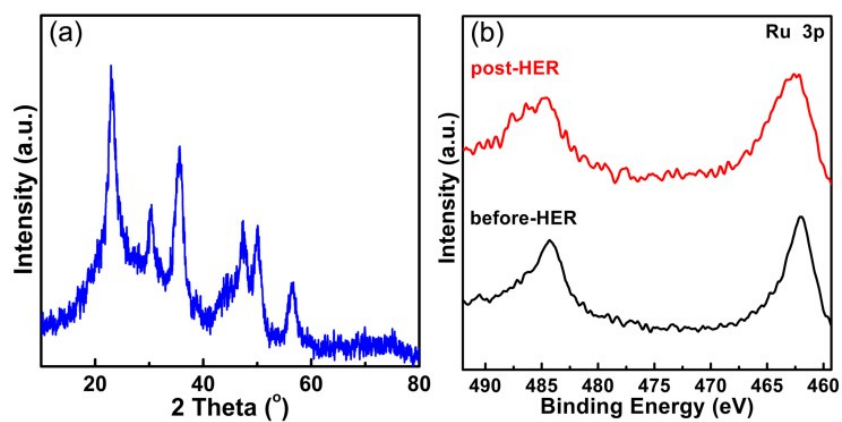

**Fig. S17** (a) PXRD pattern of RuP<sub>2</sub>@PC after HER test in 1.0 M KOH. (b) Ru 3p for RuP<sub>2</sub>@PC before and after HER test in 1.0 M KOH.

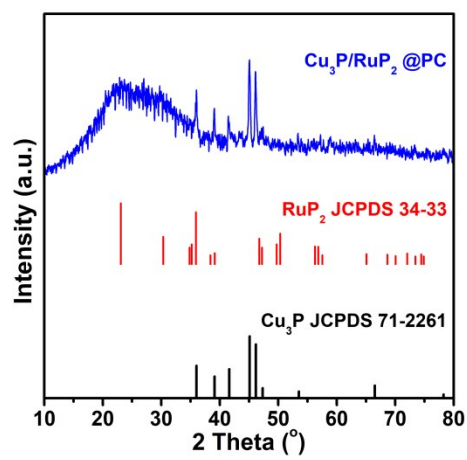

**Fig. S18** PXRD pattern of  $\text{Cu}_3\text{P}/\text{RuP}_2@\text{PC}$ .

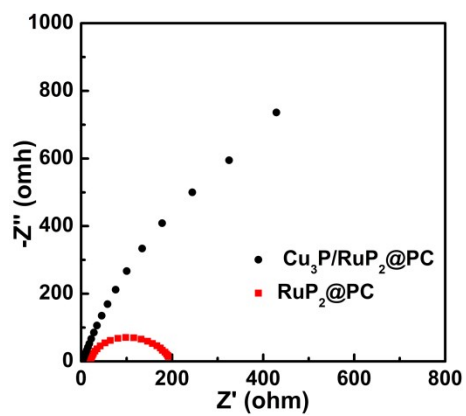

**Fig. S19** The EIS plots of  $\text{RuP}_2@\text{PC}$  and  $\text{Cu}_3\text{P}/\text{RuP}_2@\text{PC}$  in 1.0 M KOH at -156 mV vs RHE.

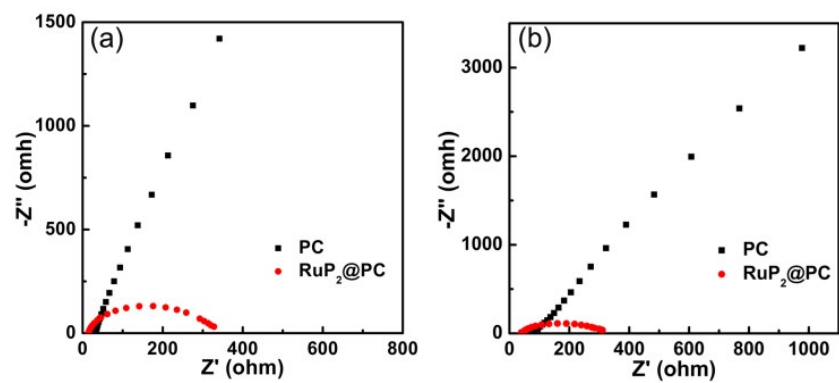

**Fig. S20** The EIS plots of PC and RuP<sub>2</sub>@PC in 0.5 M H<sub>2</sub>SO<sub>4</sub> at -29.2 mV vs RHE and 1.0 M PBS at -69.3 mV vs RHE, respectively.

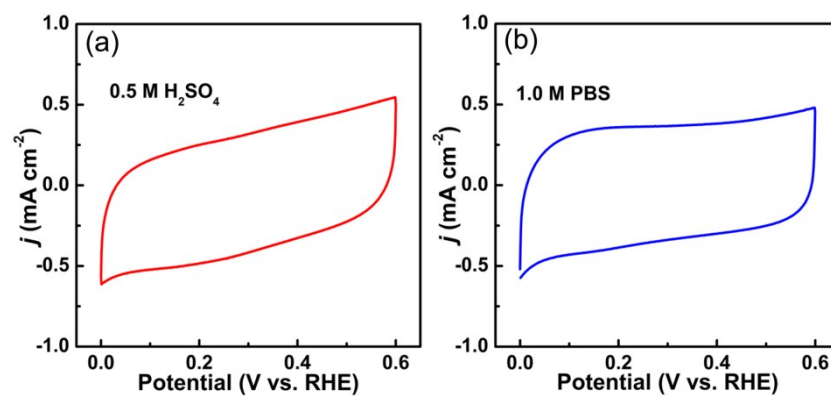

**Fig. S21** CV curves for RuP<sub>2</sub>@PC measured in 0.5 M H<sub>2</sub>SO<sub>4</sub> and 1.0 M PBS.

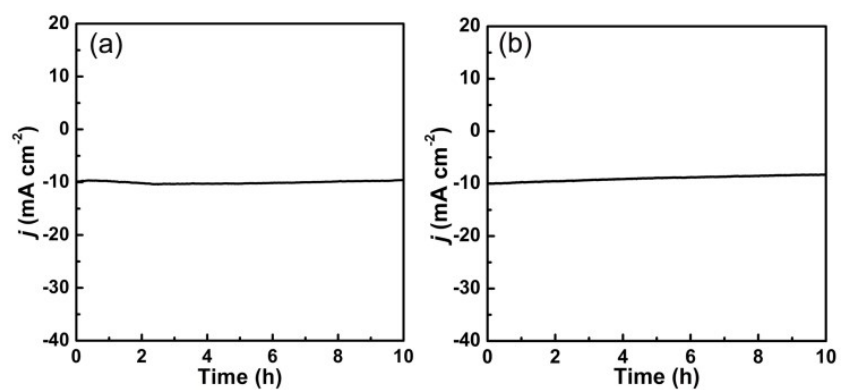

**Fig. S22** I-t curves of RuP<sub>2</sub>@PC in 0.5 M H<sub>2</sub>SO<sub>4</sub> (a) and (b) 1.0 M PBS solution.

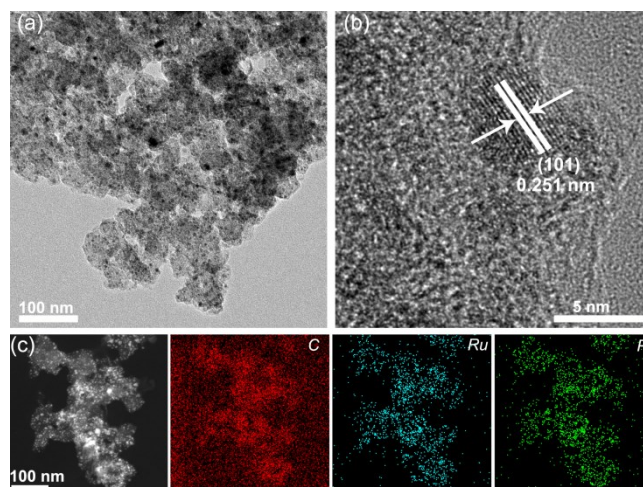

**Fig. S23** (a) TEM, (b) HRTEM, and (c) STEM and EDX elemental mapping images for C, P, and Ru in RuP<sub>2</sub>@PC after HER test in 0.5 M H<sub>2</sub>SO<sub>4</sub>.

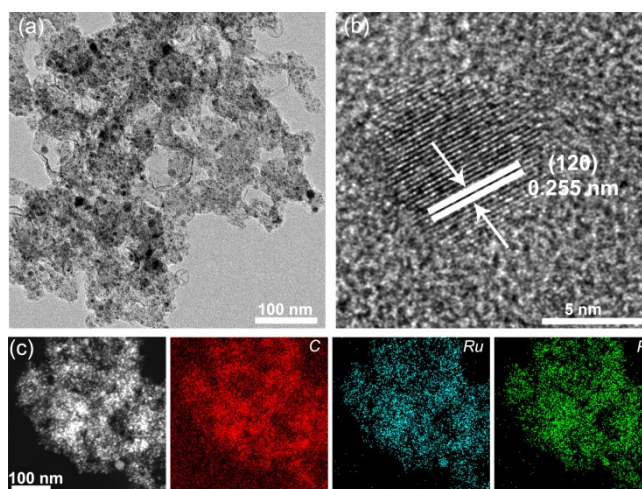

**Fig. S24** (a) TEM, (b) HRTEM, and (c) STEM and EDX elemental mapping images for C, P, and Ru in RuP<sub>2</sub>@PC after HER test in 1.0 M PBS.

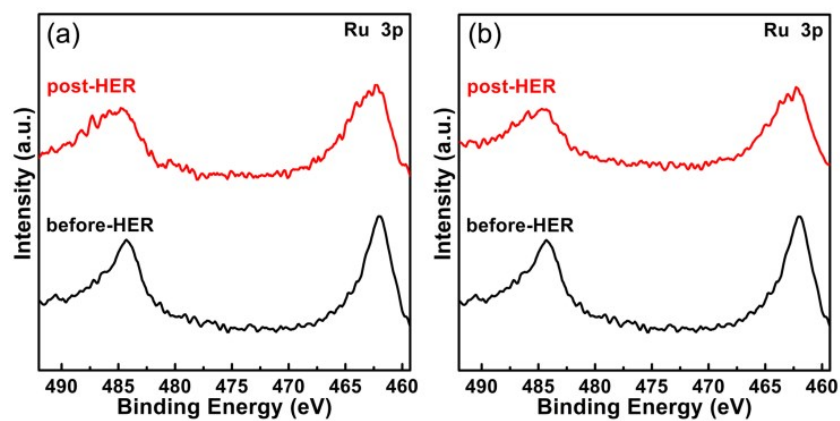

**Fig. S25** Ru 3p for RuP<sub>2</sub>@PC before and after HER test in 0.5 M H<sub>2</sub>SO<sub>4</sub> (a) and 1.0 M PBS (b).

## S2. Table in Supporting Information

**Table S1.** Comparison of catalytic performance of RuP<sub>2</sub>@PC and other reported materials toward HER in in alkaline, acidic, and neutral conditions.

| Catalysts                         | Tafel slope<br>[mV dec <sup>-1</sup> ] | $\eta_{10}$<br>(mV) | Electrolyte<br>solution              | References                                                    |
|-----------------------------------|----------------------------------------|---------------------|--------------------------------------|---------------------------------------------------------------|
| RuP <sub>2</sub> @PC              | 36.7                                   | 78.9                | 1.0 M KOH                            | <b>This work</b>                                              |
|                                   | 35.1                                   | 60.6                | 0.5 M H <sub>2</sub> SO <sub>4</sub> |                                                               |
|                                   | 66.8                                   | 113.1               | 1.0 M PBS                            |                                                               |
| RuP <sub>2</sub> /<br>1.03CDs-900 | 63.29                                  | 26                  | 1.0 M KOH                            | <i>ACS Sustainable Chem. Eng.</i> <b>2020</b> , 8, 3995–4002. |
|                                   | 61.3                                   | ~100                | 0.5 M H <sub>2</sub> SO <sub>4</sub> |                                                               |
|                                   | --                                     | --                  | 1.0 M PBS                            |                                                               |
| NFP/C-3                           | 72                                     | 95                  | 1.0 M KOH                            | <i>Sci. Adv.</i> <b>2019</b> , 5, eaav6009.                   |
|                                   | 54                                     | 72                  | 0.5 M H <sub>2</sub> SO <sub>4</sub> |                                                               |
|                                   | 70                                     | 117                 | 1.0 M PBS                            |                                                               |
| Ru <sub>2</sub> P                 | 43                                     | 57                  | 1.0 M KOH                            | <i>Chem. Commun.</i> <b>2019</b> , 55, 7828.                  |
|                                   | 101                                    | ---                 | 0.5 M H <sub>2</sub> SO <sub>4</sub> |                                                               |
|                                   | ---                                    | ~210                | 1.0 M PBS                            |                                                               |
| RuP <sub>2</sub> /CNT             | 65                                     | 40                  | 1.0 M KOH                            | <i>Chem. Eur.J.</i> <b>2019</b> , 25, 8579.                   |
|                                   | 57                                     | 58                  | 0.5 M H <sub>2</sub> SO <sub>4</sub> |                                                               |
|                                   | 82                                     | 109                 | 1.0 M PBS                            |                                                               |
| MoP/CNTs-700                      | 73                                     | 86                  | 1.0 M KOH                            | <i>Adv. Funct. Mater.</i> <b>2018</b> , 28, 1706523           |
|                                   | 60                                     | 83                  | 0.5 M H <sub>2</sub> SO <sub>4</sub> |                                                               |
|                                   | 115                                    | 102                 | 1.0 M PBS                            |                                                               |
| L-RP/C                            | 34                                     | 18                  | 1.0 M KOH                            | <i>Adv. Mater.</i> <b>2018</b> , 30, 1800047.                 |
|                                   | 37                                     | 19                  | 0.5 M H <sub>2</sub> SO <sub>4</sub> |                                                               |
|                                   | 37                                     | 95                  | 1.0 M PBS                            |                                                               |
| RuP <sub>2</sub> @NPC             | 69                                     | 52                  | 1.0 M KOH                            | <i>Angew. Chem. Int. Ed.</i> <b>2017</b> , 129, 11717.        |
|                                   | 38                                     | 38                  | 0.5 M H <sub>2</sub> SO <sub>4</sub> |                                                               |
|                                   | 87                                     | 57                  | 1.0 M PBS                            |                                                               |
| CoP@BCN                           | 52                                     | 215                 | 1.0 M KOH                            | <i>Adv. Energy Mater.</i> <b>2017</b> , 7, 1601671.           |
|                                   | 46                                     | 87                  | 0.5 M H <sub>2</sub> SO <sub>4</sub> |                                                               |
|                                   | 59                                     | 122                 | 1.0 M PBS                            |                                                               |

### S3. Note in Supporting Information

#### Note 1.

The HER process can be described using the following elementary steps:

under acidic condition:

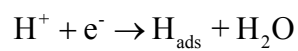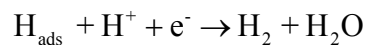

under alkaline condition:

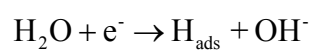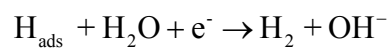

Under acidic condition, hydrogen ions (protons) directly combine with an electron and then are chemically adsorbed on the surface of the electrocatalysts, forming  $\text{H}_{\text{ads}}$ , whereas in alkaline solutions, the hydrogen ions are from the cleaved water molecules.
